# Supplementary material for: Mechanophotonics: precise selection, assembly and disassembly of polymer optical microcavities via mechanical manipulation for spectral engineering
Source: Royal Society of Chemistry journal article supplement (doi:10.1039/d0na00560f), 2020-01-01
Supplement: d0na00560f1.pdf [file d0na00560f1.pdf]

## Supporting Information

### Mechanophotonics: Precise-Selection, Assembly and Disassembly of Polymer Optical Microcavities via Mechanical Micromanipulation for Spectral Engineering

*M. Annadhasan, A. Vinod Kumar, D. Venkatakrishnarao, E. A. Mamonov, R. Chandrasekar\**

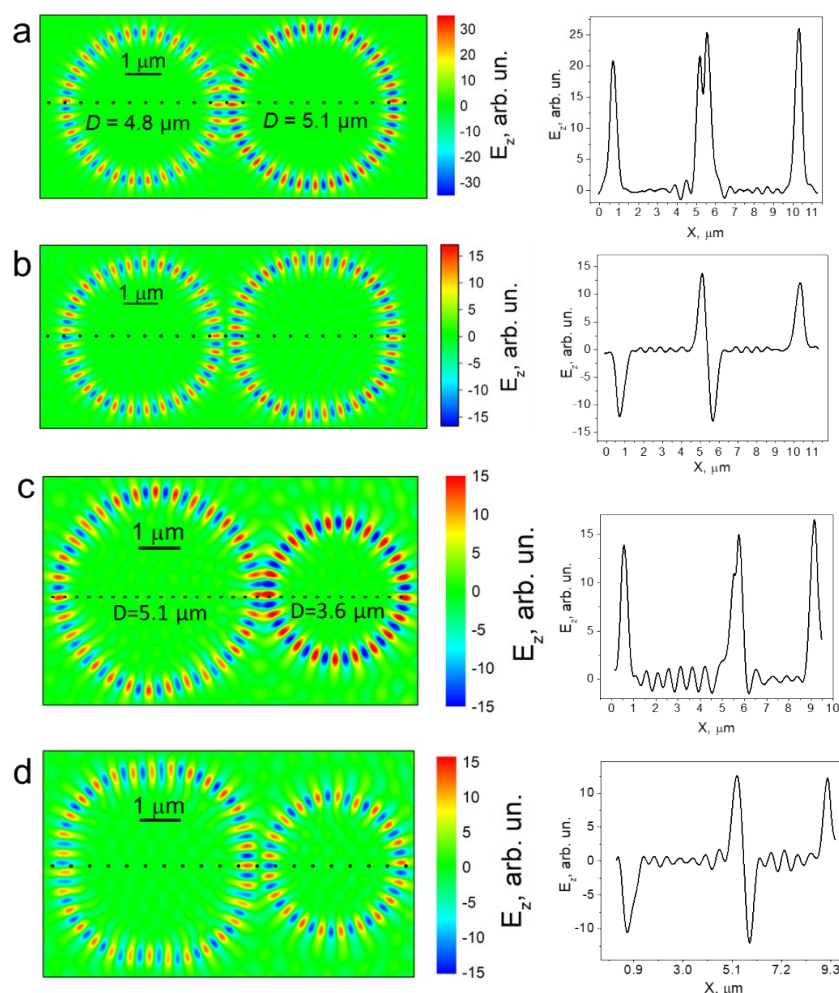

**Figure S1.** a and b) Calculated electric field ( $E_z$ ) distributions for bonding and anti-bonding modes in the dimer for TM-31 and TM-29 modes corresponding to cavities *A* and *B*, respectively. c and d) Calculated electric field ( $E_z$ ) distributions for bonding and anti-bonding modes in the dimer for TM-31 and TM-21 modes corresponding to cavities *B* and *C*, respectively. The considered distance between the spheres is 50 nm.

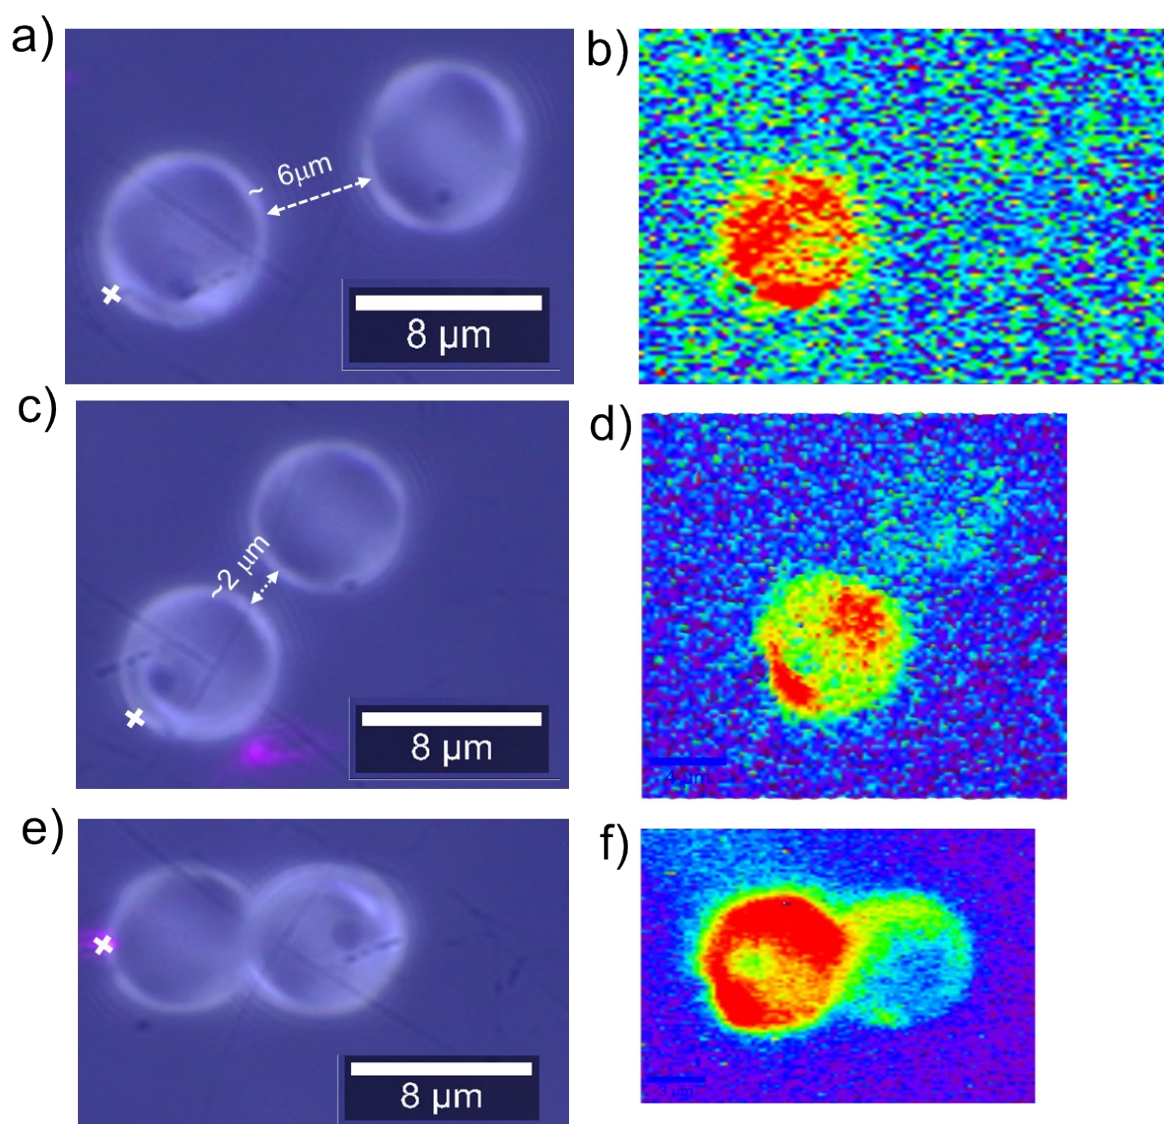

**Figure S2.** a, c, and e) Adjusting the gap between the WGM cavities via AFM cantilever. The “x” label indicates the excitation position. The corresponding FL images are shown in b, d, and f).
